# Supplementary material for: Recognition of COVID-19 with occupational origin: a comparison between European countries
Source: HighWire-hosted journal article supplement (doi:10.1136/oemed-2022-108726), 2023-11-20
Supplement: oemed-2022-108726supp001_data_supplement.pdf [file oemed-2022-108726supp001_data_supplement.pdf]

**APPENDIX 1****Questionnaire, COVID-19 recognised as occupational disease/occupational injury****Important:**

- 1) If there are differences between COVID as an OD and other OD, your response should be COVID-specific
- 2) Make a clear distinction between what is already practised and what is only discussed for the future

|                                                                                                                                                                                                                                                                                                                                            |
|--------------------------------------------------------------------------------------------------------------------------------------------------------------------------------------------------------------------------------------------------------------------------------------------------------------------------------------------|
| <b>Question</b>                                                                                                                                                                                                                                                                                                                            |
| <b>Briefly define (if relevant for COVID as an OD/OI) in your country</b><br><ol style="list-style-type: none"> <li>1) Occupational disease</li> <li>2) Occupational injury</li> <li>3) Other related terminology</li> </ol>                                                                                                               |
| <b>National system of occupational diseases,</b><br><ol style="list-style-type: none"> <li>1) only list system</li> <li>2) mixed system: List and open system (includes list system with opening clause for diseases not yet listed)</li> <li>3) only open system</li> <li>4) none</li> <li>5) Other, please specify</li> </ol>            |
| Name of occupational disease <b>agency</b> by aim:<br><ol style="list-style-type: none"> <li>1) Compensation</li> <li>2) Statistics</li> </ol>                                                                                                                                                                                             |
| Who <b>decides on extension of list</b>                                                                                                                                                                                                                                                                                                    |
| Who <b>decides on recognition of individual claims</b>                                                                                                                                                                                                                                                                                     |
| <b>COVID-19 can be recognized as</b><br><ol style="list-style-type: none"> <li>1) occupational disease OD</li> <li>2) Occupational injury OI</li> <li>3) Either OD or OI</li> <li>4) None</li> <li>5) Other, please specify</li> </ol>                                                                                                     |
| <b>When was COVID-19 included as OD/OI</b>                                                                                                                                                                                                                                                                                                 |
| <b>Who is covered for COVID-19</b><br><ol style="list-style-type: none"> <li>1) Please specify branches or job titles included or excluded</li> <li>2) Coverage of volunteers, precarious workers (eg, migrants)</li> <li>3) Approximate overall percentage of coverage (taking onto account your response to 1) and 2)</li> </ol>         |
| <b>What is considered proof of occupational exposure to SARS-CoV-2</b><br><ol style="list-style-type: none"> <li>1) Work in certain jobs, which:.....</li> <li>2) Contact with colleague with confirmed infection</li> <li>3) Contact with client with confirmed infection 4) Other, please specify:.....</li> </ol>                       |
| <b>What is considered proof of disease</b><br>Please specify minimum requirements<br><ol style="list-style-type: none"> <li>1) Typical symptoms (possible case)</li> <li>2) Typical symptoms and confirmed contact (probable case)</li> <li>3) Positive PCR test or serology (confirmed case)</li> <li>5) Other, please specify</li> </ol> |
| Is <b>long-COVID</b> (symptoms or disabilities) included                                                                                                                                                                                                                                                                                   |
| <b>Proof of work-relatedness</b>                                                                                                                                                                                                                                                                                                           |
| Role of (non-)use of PPE, please specify how,<br><ol style="list-style-type: none"> <li>1) Considered, but no impact on recognition</li> </ol>                                                                                                                                                                                             |

|                                                                                                                                                                                                                                                                                                                                                                                                                        |
|------------------------------------------------------------------------------------------------------------------------------------------------------------------------------------------------------------------------------------------------------------------------------------------------------------------------------------------------------------------------------------------------------------------------|
| <ul style="list-style-type: none"> <li>2) non-use precludes recognition of OD/OI</li> <li>3) use precludes recognition of OD/OI</li> </ul>                                                                                                                                                                                                                                                                             |
| Role of competing non-occupational exposure in recognition as OD/OI (please specify if and how this is considered in recognition as an OD/OI)                                                                                                                                                                                                                                                                          |
| <b>Home office</b> , are OD/OI covered?<br>please provide free text for examples                                                                                                                                                                                                                                                                                                                                       |
| <b>Commuting accident</b> are OI covered?                                                                                                                                                                                                                                                                                                                                                                              |
| <b>Benefits</b> <ul style="list-style-type: none"> <li>1) Treatment</li> <br/> <li>2) Rehabilitation</li> <li>3) Fully paid long-term sick leave</li> <li>4) Disability pension</li> <li>5) Pension to surviving family member</li> <li>6) Other</li> </ul>                                                                                                                                                            |
| <b>Numbers of claims and recognized cases of COVID as OD/OI (by date)</b>                                                                                                                                                                                                                                                                                                                                              |
| <b>Are there case registries</b> for surveillance (eg for monitoring of long-COVID and research) for <ul style="list-style-type: none"> <li>1) For COVID as OD/OI<br/>Provide number of cases registered (by date)</li> <li>2) For other OD (eg total Infectious Diseases), but not COVID (eg, annual 2019 data)</li> <li>3) For COVID (independent of OD)<br/>Provide number of cases registered (by date)</li> </ul> |
| <b>Cost per case of occupational disease</b><br>(NB, when data are not yet available, please report any illustrative data, eg 100% sick leave for extended period, cost of treatment)                                                                                                                                                                                                                                  |
| Any <b>other important notes</b> that do not fit under any of the above questions?                                                                                                                                                                                                                                                                                                                                     |

## Appendix 2

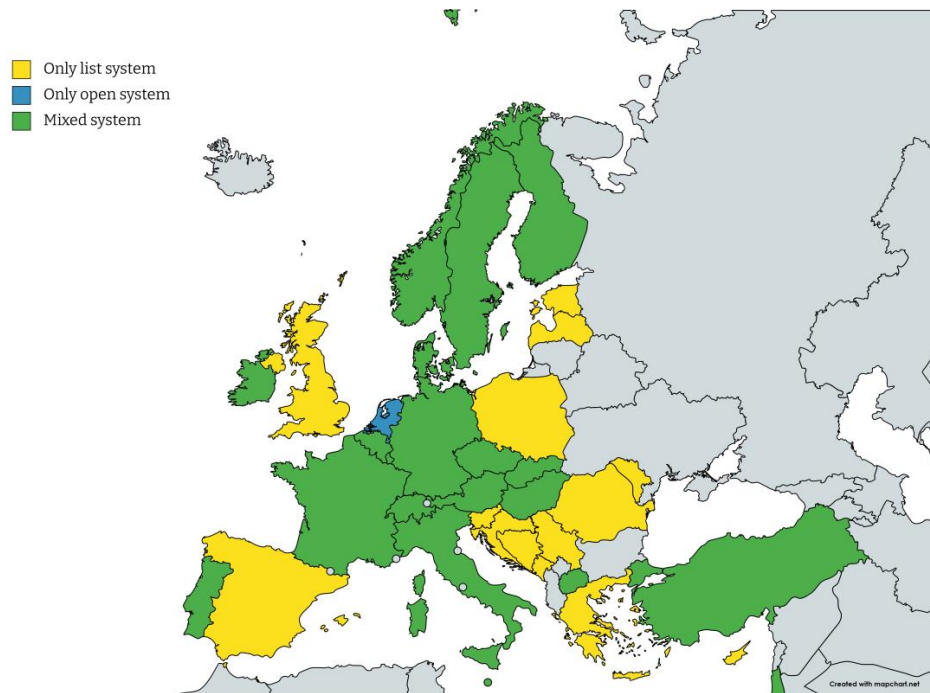

National systems of occupational diseases (April 2022)
